# Supplementary material
Source: PubMed Central journal article supplement (PMC9991077)

## Coronary Obstruction – Supplementary Material

TABLE S1 Contributing sites

| <i>Site</i>                                          | <i>Country</i> | <i>PI</i>                           | <i>n</i> |
|------------------------------------------------------|----------------|-------------------------------------|----------|
| West China Hospital                                  | China          | Mao Chen, Yijian Li                 | 10       |
| Hamburg                                              | Germany        | Sebastian Ludwig, Dirk Westermann   | 10       |
| Emory University Hospital                            | USA            | Vasilis Babaliaros                  | 9        |
| Hospital Clinico Universitario Valladolid            | Spain          | Ignacio J. Amat Santos              | 8        |
| Institute of Cardiology Warsaw                       | Poland         | Lukasz Kalinczuk                    | 7        |
| MedStar Washington Hospital Center                   | USA            | Ron Waksman                         | 6        |
| University of Bonn                                   | Germany        | Jan-Malte Sinning                   | 6        |
| Kokura Memorial Hospital                             | Japan          | Shinichi Shirai, Tomohiro Kawaguchi | 5        |
| Kurashiki Central Hospital                           | Japan          | Yasushi Fuku                        | 5        |
| St. Michael's Hospital                               | Canada         | Asim Cheema                         | 5        |
| Hospital Da Santa Cruz                               | Portugal       | Afonso Felix de Oliveira            | 3        |
| Toyohashi Heart Center / Nagoya Heart Center         | Japan          | Masanori Yamamoto, Ai Kagase        | 3        |
| Rabin Medical Center                                 | Israel         | Pablo Codner                        | 2        |
| Hospital Universitario Central De Asturias           | Spain          | Raquel Del Valle                    | 2        |
| GVI Buffalo                                          | USA            | Vijay Iyer                          | 2        |
| Hospital Clinico Universitario Virgen de la Victoria | Spain          | Erika Muoz Garcia                   | 2        |
| Seoul National University Hospital                   | South Korea    | Hyosoo Kim                          | 1        |
| National Taiwan University Hospital                  | Taiwan         | Mao-Shin Lin                        | 1        |
| Florida Atlantic University                          | USA            | Brij Maini                          | 1        |
| Lankenau Medical Center                              | USA            | Roberto Rodriguez                   | 1        |
| San Raffaele Scientific Institute                    | Italy          | Montorfano Matteo, Ancona Marco     | 1        |
| Sendai Kosei Hospital                                | Japan          | Norio Tada, Masaki Miyasaka         | 1        |
| Westchester Medical Center                           | USA            | Hasan Ahmad                         | 1        |
| Thomas Jefferson University Hospital                 | USA            | Nicholas Ruggiero                   | 1        |
| McLaren Northern Michigan                            | USA            | Jason Ricci                         | 1        |

TABLE S2 Comparison after propensity-score matching

|                                     | <i>Obstruction (n=60)</i> | <i>No obstruction (n=60)</i> | <i>p-value</i> |
|-------------------------------------|---------------------------|------------------------------|----------------|
| Female                              | 35 (58.3%)                | 35 (58.3%)                   | 1.00           |
| Age                                 | 79.6 ± 8.1                | 77.7 ± 9.5                   | 0.23           |
| Annulus area (mm <sup>2</sup> )     | 415 ± 89                  | 416 ± 88                     | 0.97           |
| Annulus perimeter (mm)              | 70.6 ± 13.7               | 72.3 ± 7.5                   | 0.40           |
| Coronary artery height (left) (mm)  | 10.8 ± 3.3                | 13.1 ± 2.5                   | 0.001          |
| Coronary artery height (right) (mm) | 12.4 ± 1.7                | 14.5 ± 3.4                   | 0.01           |
| Sinus diameter (left) (mm)          | 29.8 ± 3.4                | 30.4 ± 3.5                   | 0.43           |
| Sinus diameter (right) (mm)         | 26.3 ± 2.6                | 28.8 ± 3.4                   | 0.02           |
| STJ height left (mm)                | 17.5 ± 2.9                | 21.2 ± 4.4                   | <0.001         |
| STJ height right (mm)               | 17.8 ± 2.5                | 21.4 ± 4.4                   | <0.001         |
| STJ diameter (mm)                   | 26.2 ± 3.1                | 27.7 ± 2.6                   | 0.009          |
| Left Sinus – THV diameter (mm)      | 5 ± 3.2                   | 6.6 ± 3.7                    | 0.06           |
| Right Sinus – THV diameter (mm)     | 2.7 ± 3.5                 | 4.9 ± 3.6                    | 0.06           |

TABLE S3 Univariate logistic model

| <i>Left coronary</i>          | <i>Odds ratio</i> | <i>95% CI</i> | <i>p-value</i> |
|-------------------------------|-------------------|---------------|----------------|
| Cusp height – coronary height | 1.66              | 1.33-2.10     | <0.0001        |
| VTC                           | 0.49              | 0.36-0.68     | <0.0001        |
| Leaflet calcium volume        | 1.00              | 1.00-1.01     | 0.01           |

  

| <i>Right coronary</i>         | <i>Odds ratio</i> | <i>95% CI</i> | <i>p-value</i> |
|-------------------------------|-------------------|---------------|----------------|
| Cusp height – coronary height | 1.94              | 1.31-2.88     | 0.001          |
| VTC                           | 0.43              | 0.27-0.71     | 0.0008         |
| Leaflet calcium volume        | 1.00              | 1.00-1.01     | 0.048          |

TABLE S4 Multivariate model using leaflet length

|       | <i><b>AUC</b></i> | <i><b>Sensitivity</b></i> | <i><b>Specificity</b></i> |
|-------|-------------------|---------------------------|---------------------------|
| Left  | 0.89              | 0.92                      | 0.82                      |
| Right | 0.89              | 0.77                      | 0.93                      |

Figure S1

# Figure S1. Coronary height and Cusp height

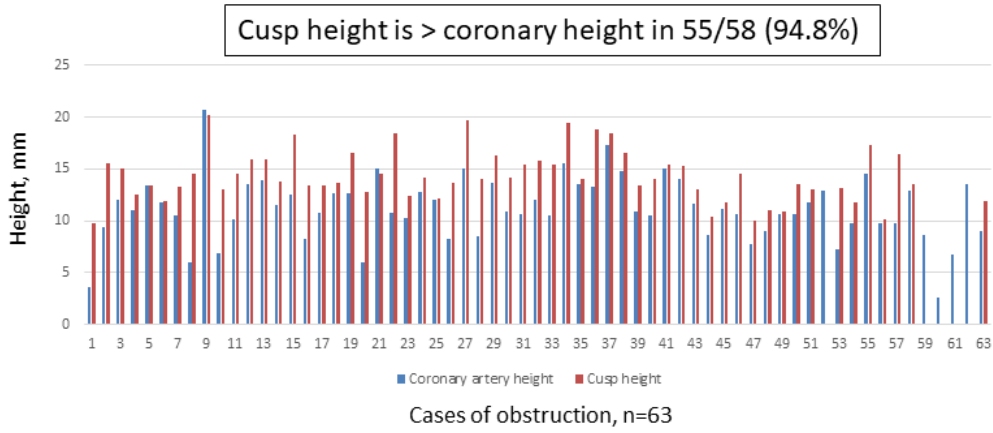

Figure S2

Figure S2. VTC and Leaflet Calcium Volume

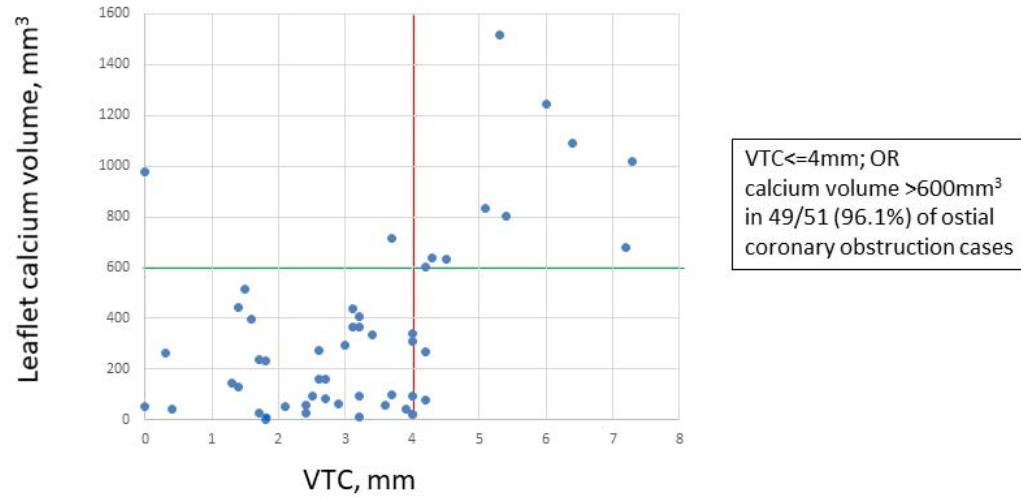

Figure S3

Figure S3. ROC curves for individual model parameters

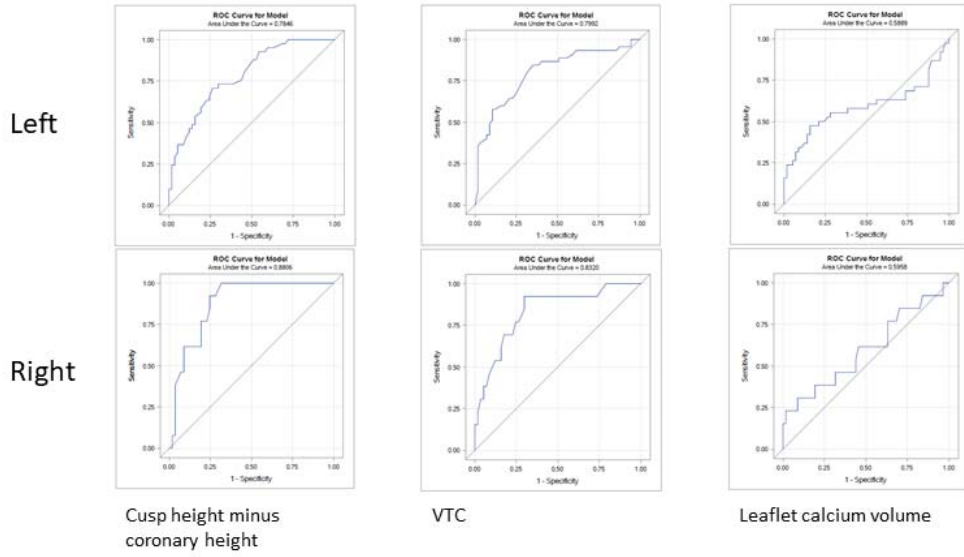

Supplement: NIHMS1859160-supplement-1.pdf [file NIHMS1859160-supplement-1.pdf]
